# Supplementary material for: Directed evolution of stabilized IgG1-Fc scaffolds by application of strong heat shock to libraries displayed on yeast
Source: PubMed Central journal article supplement — Biochim Biophys Acta. 2012 Apr;1824(4):542–9. doi: 10.1016/j.bbapap.2012.01.006 (PMC3787792; doi:10.1016/j.bbapap.2012.01.006), 2012-04
Supplement: mmc1.pdf [file mmc1.pdf]

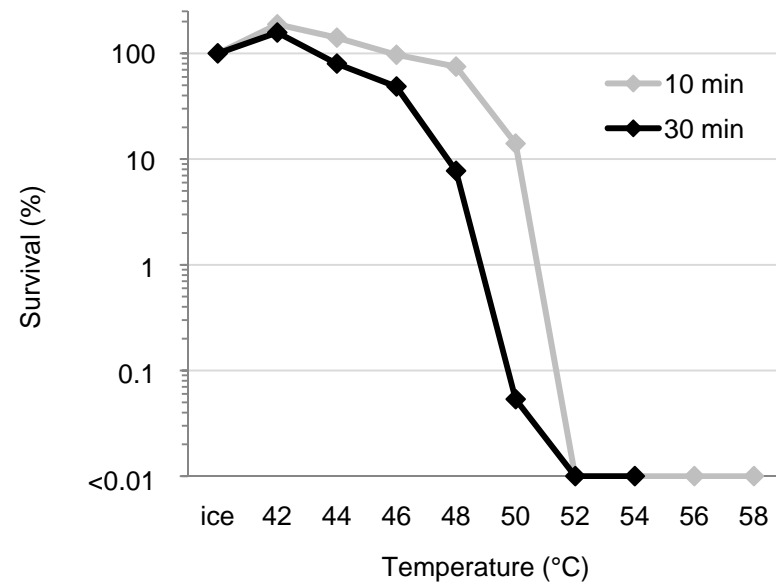

Supplemental Figure 1, Traxlmayr et al.



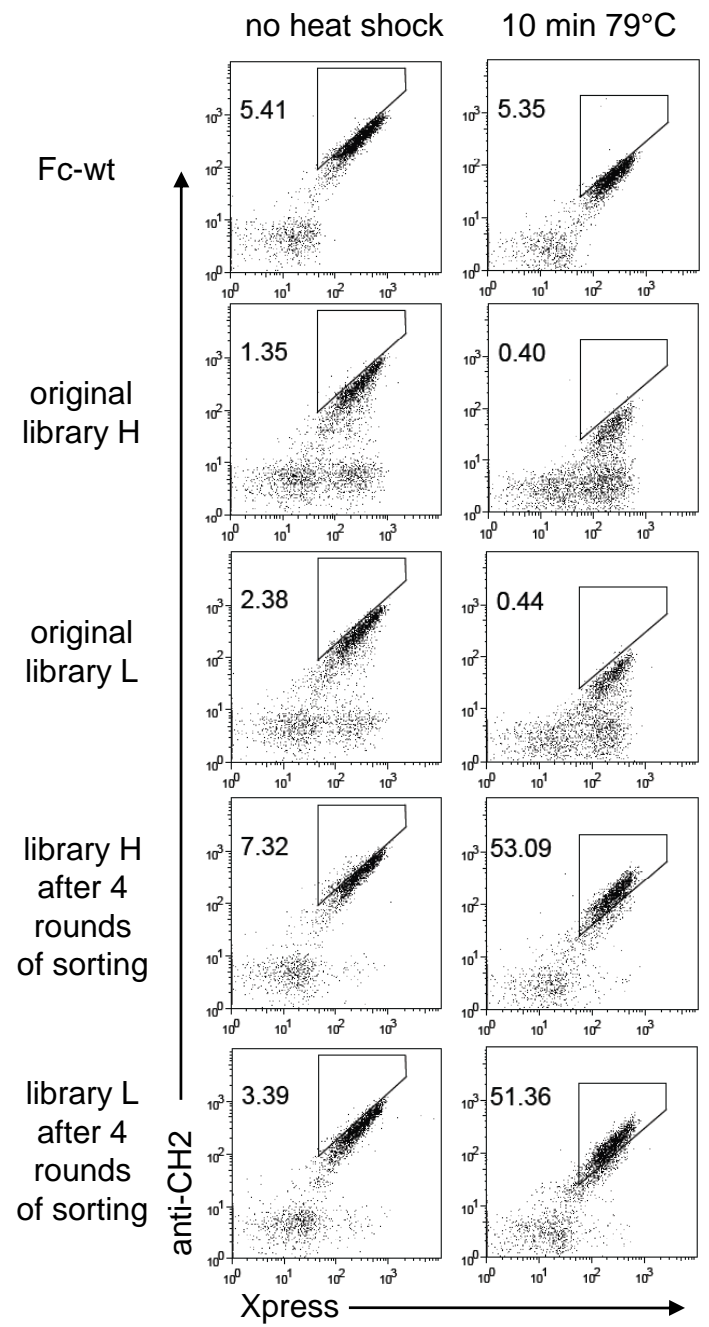

Supplemental Figure 3, Traxlmayr et al.

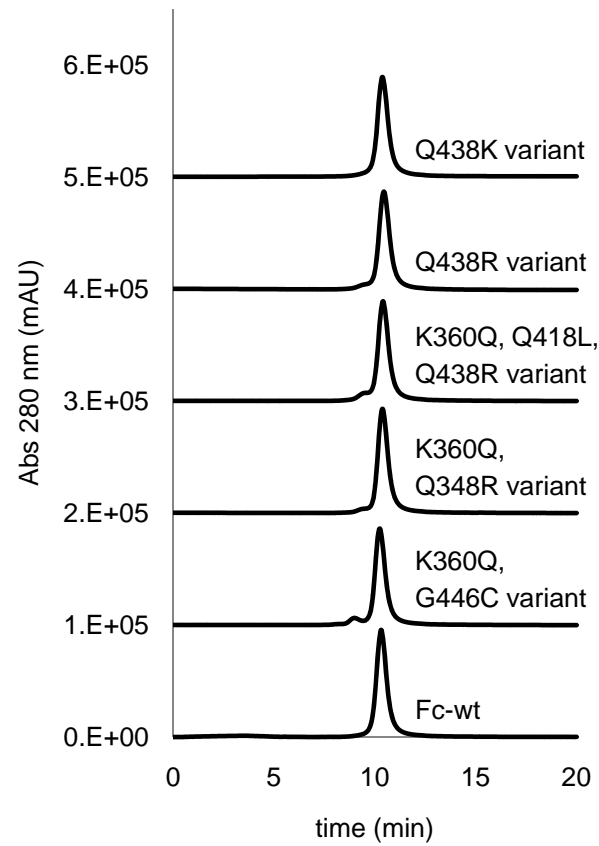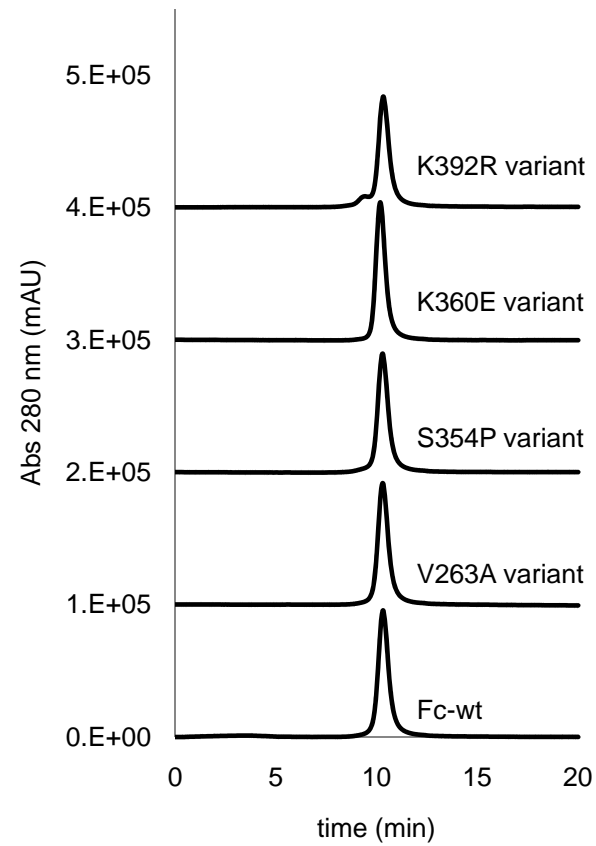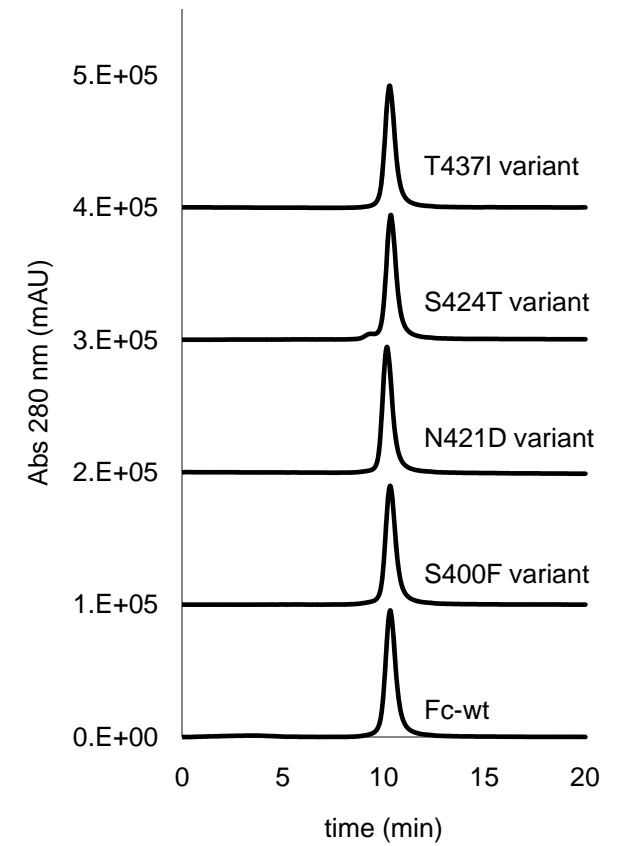

Supplemental Figure 4, Traxlmayr et al.

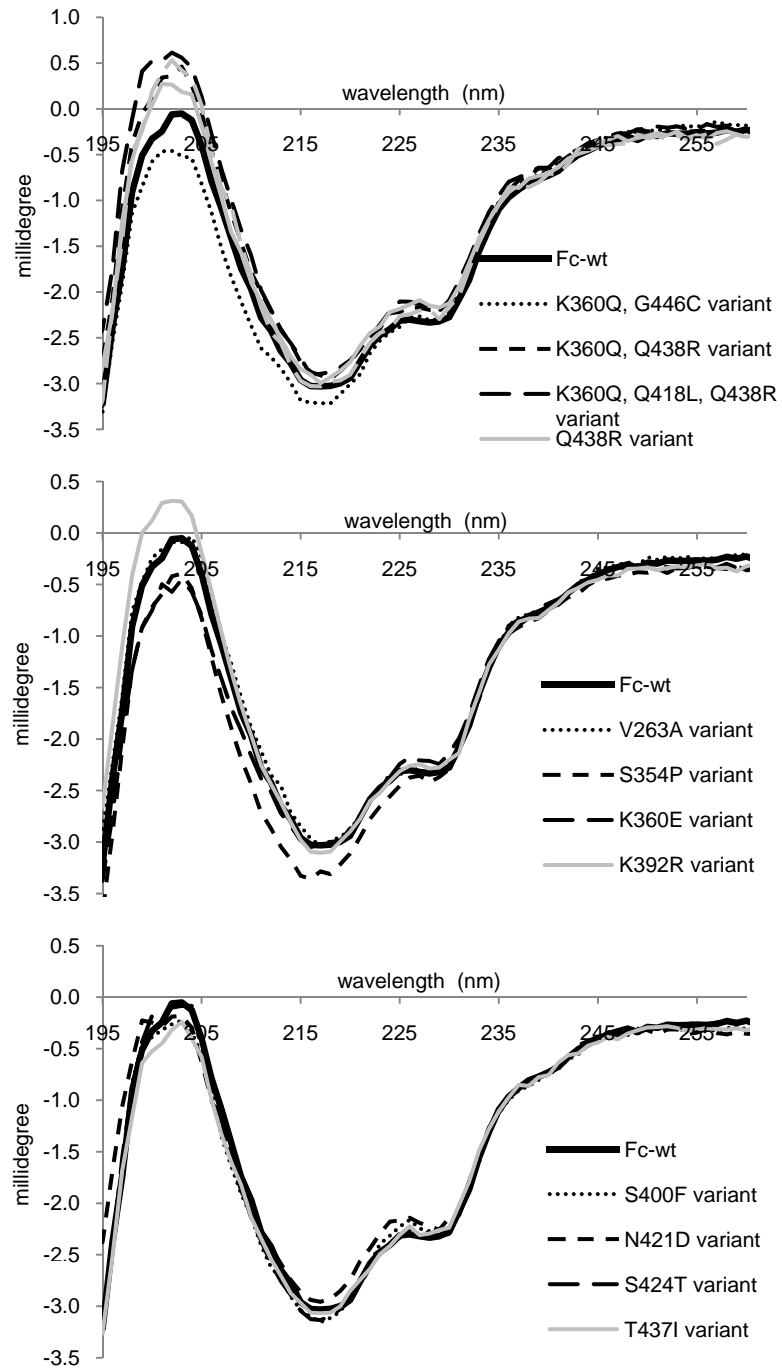

Supplemental Figure 5, Traxlmayr et al.

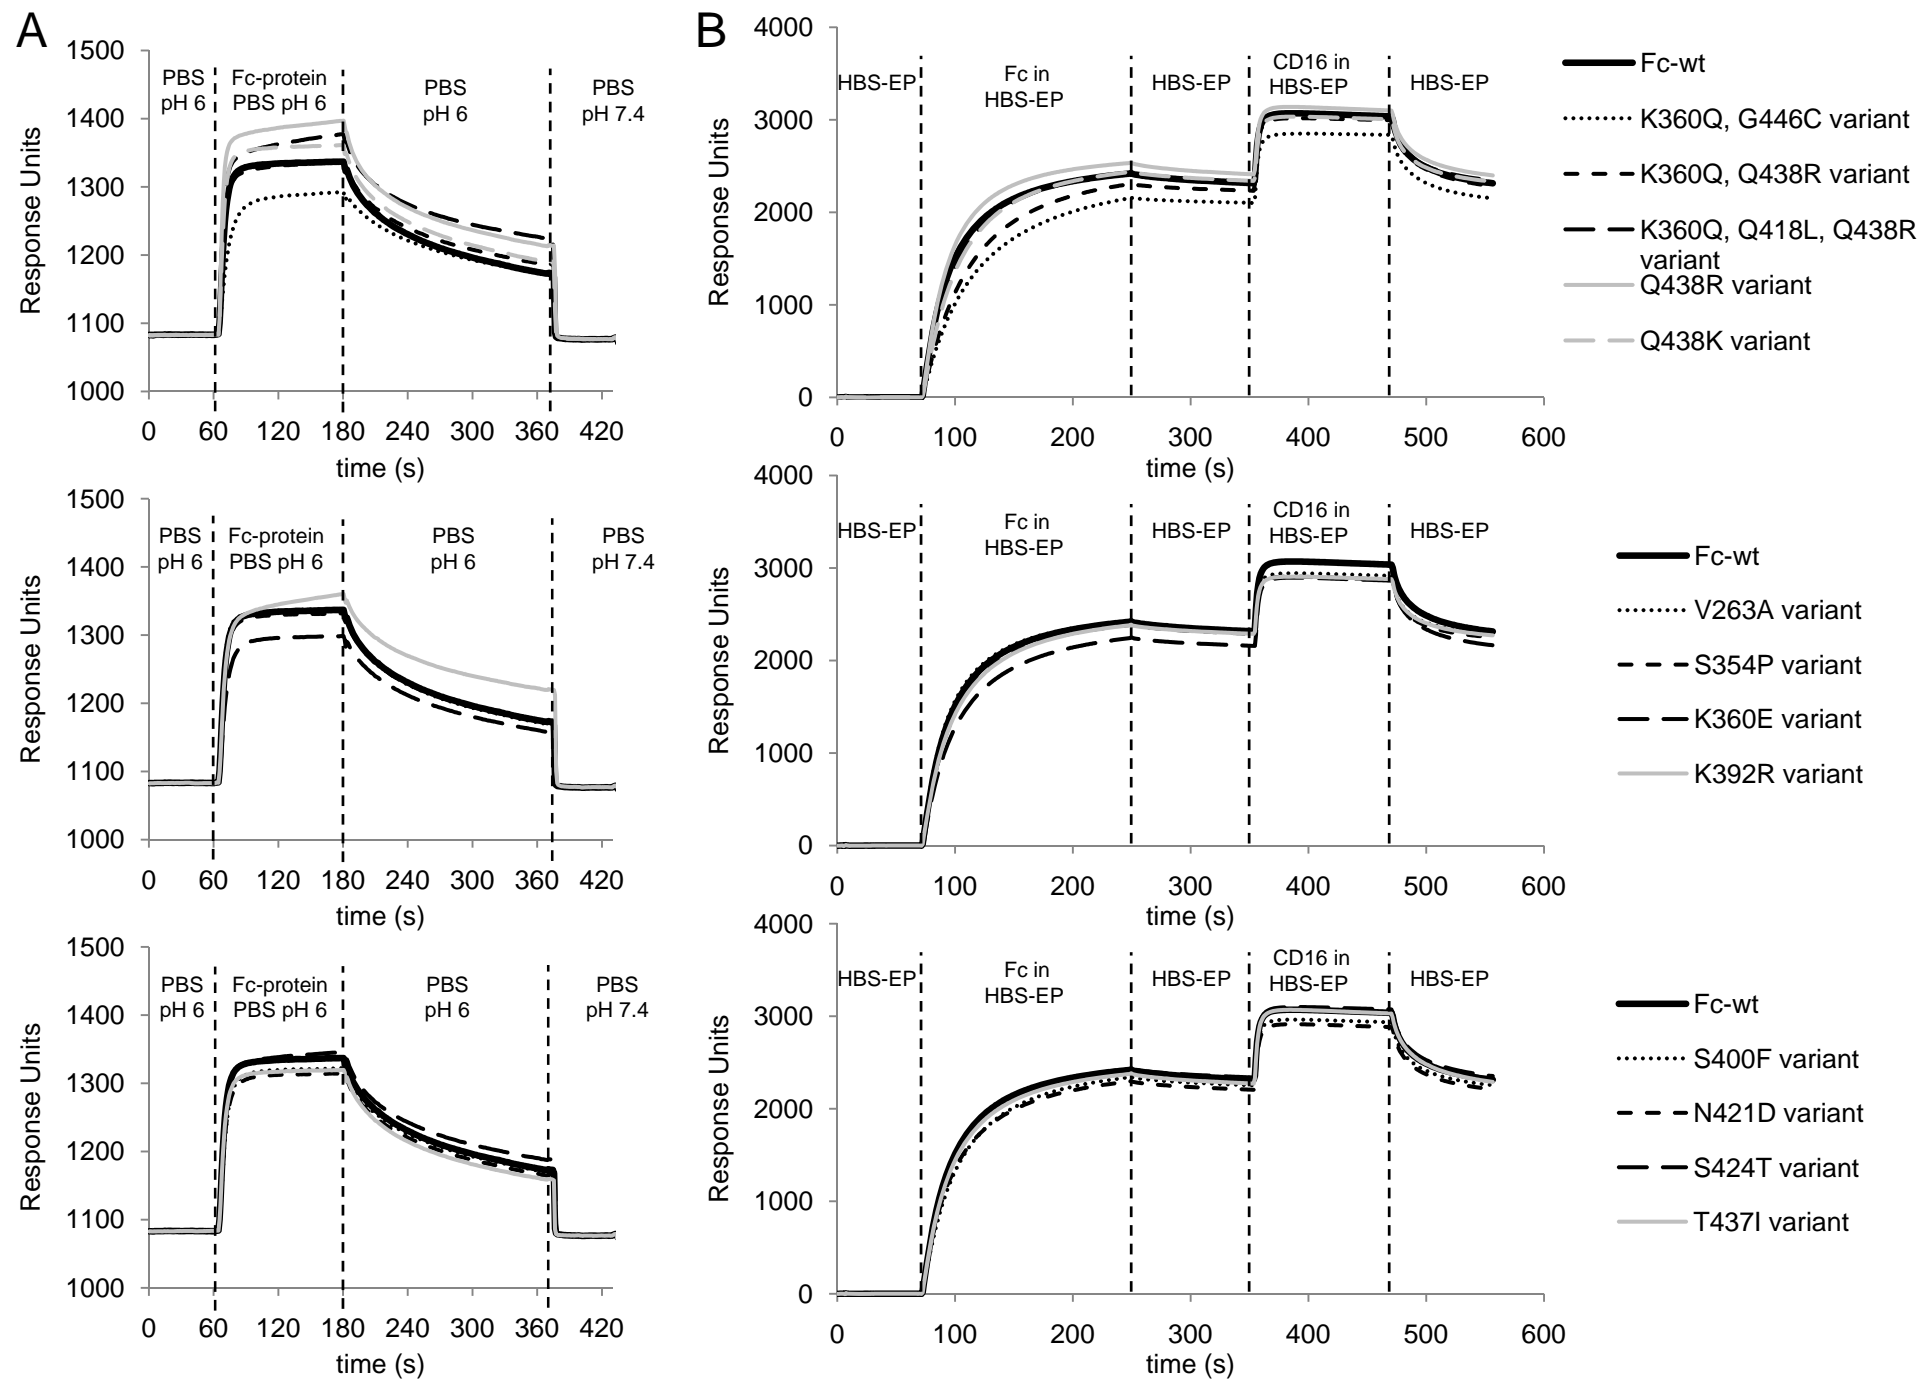

Supplemental Figure 6, Traxlmayr et al.
